# Supplementary material for: The LRRK2 Variant E193K Prevents Mitochondrial Fission Upon MPP+ Treatment by Altering LRRK2 Binding to DRP1
Source: PubMed Central journal article supplement (PMC5835904; doi:10.3389/fnmol.2018.00064), 2018-02-28
Supplement: Image_1.pdf [file Image_1.pdf]

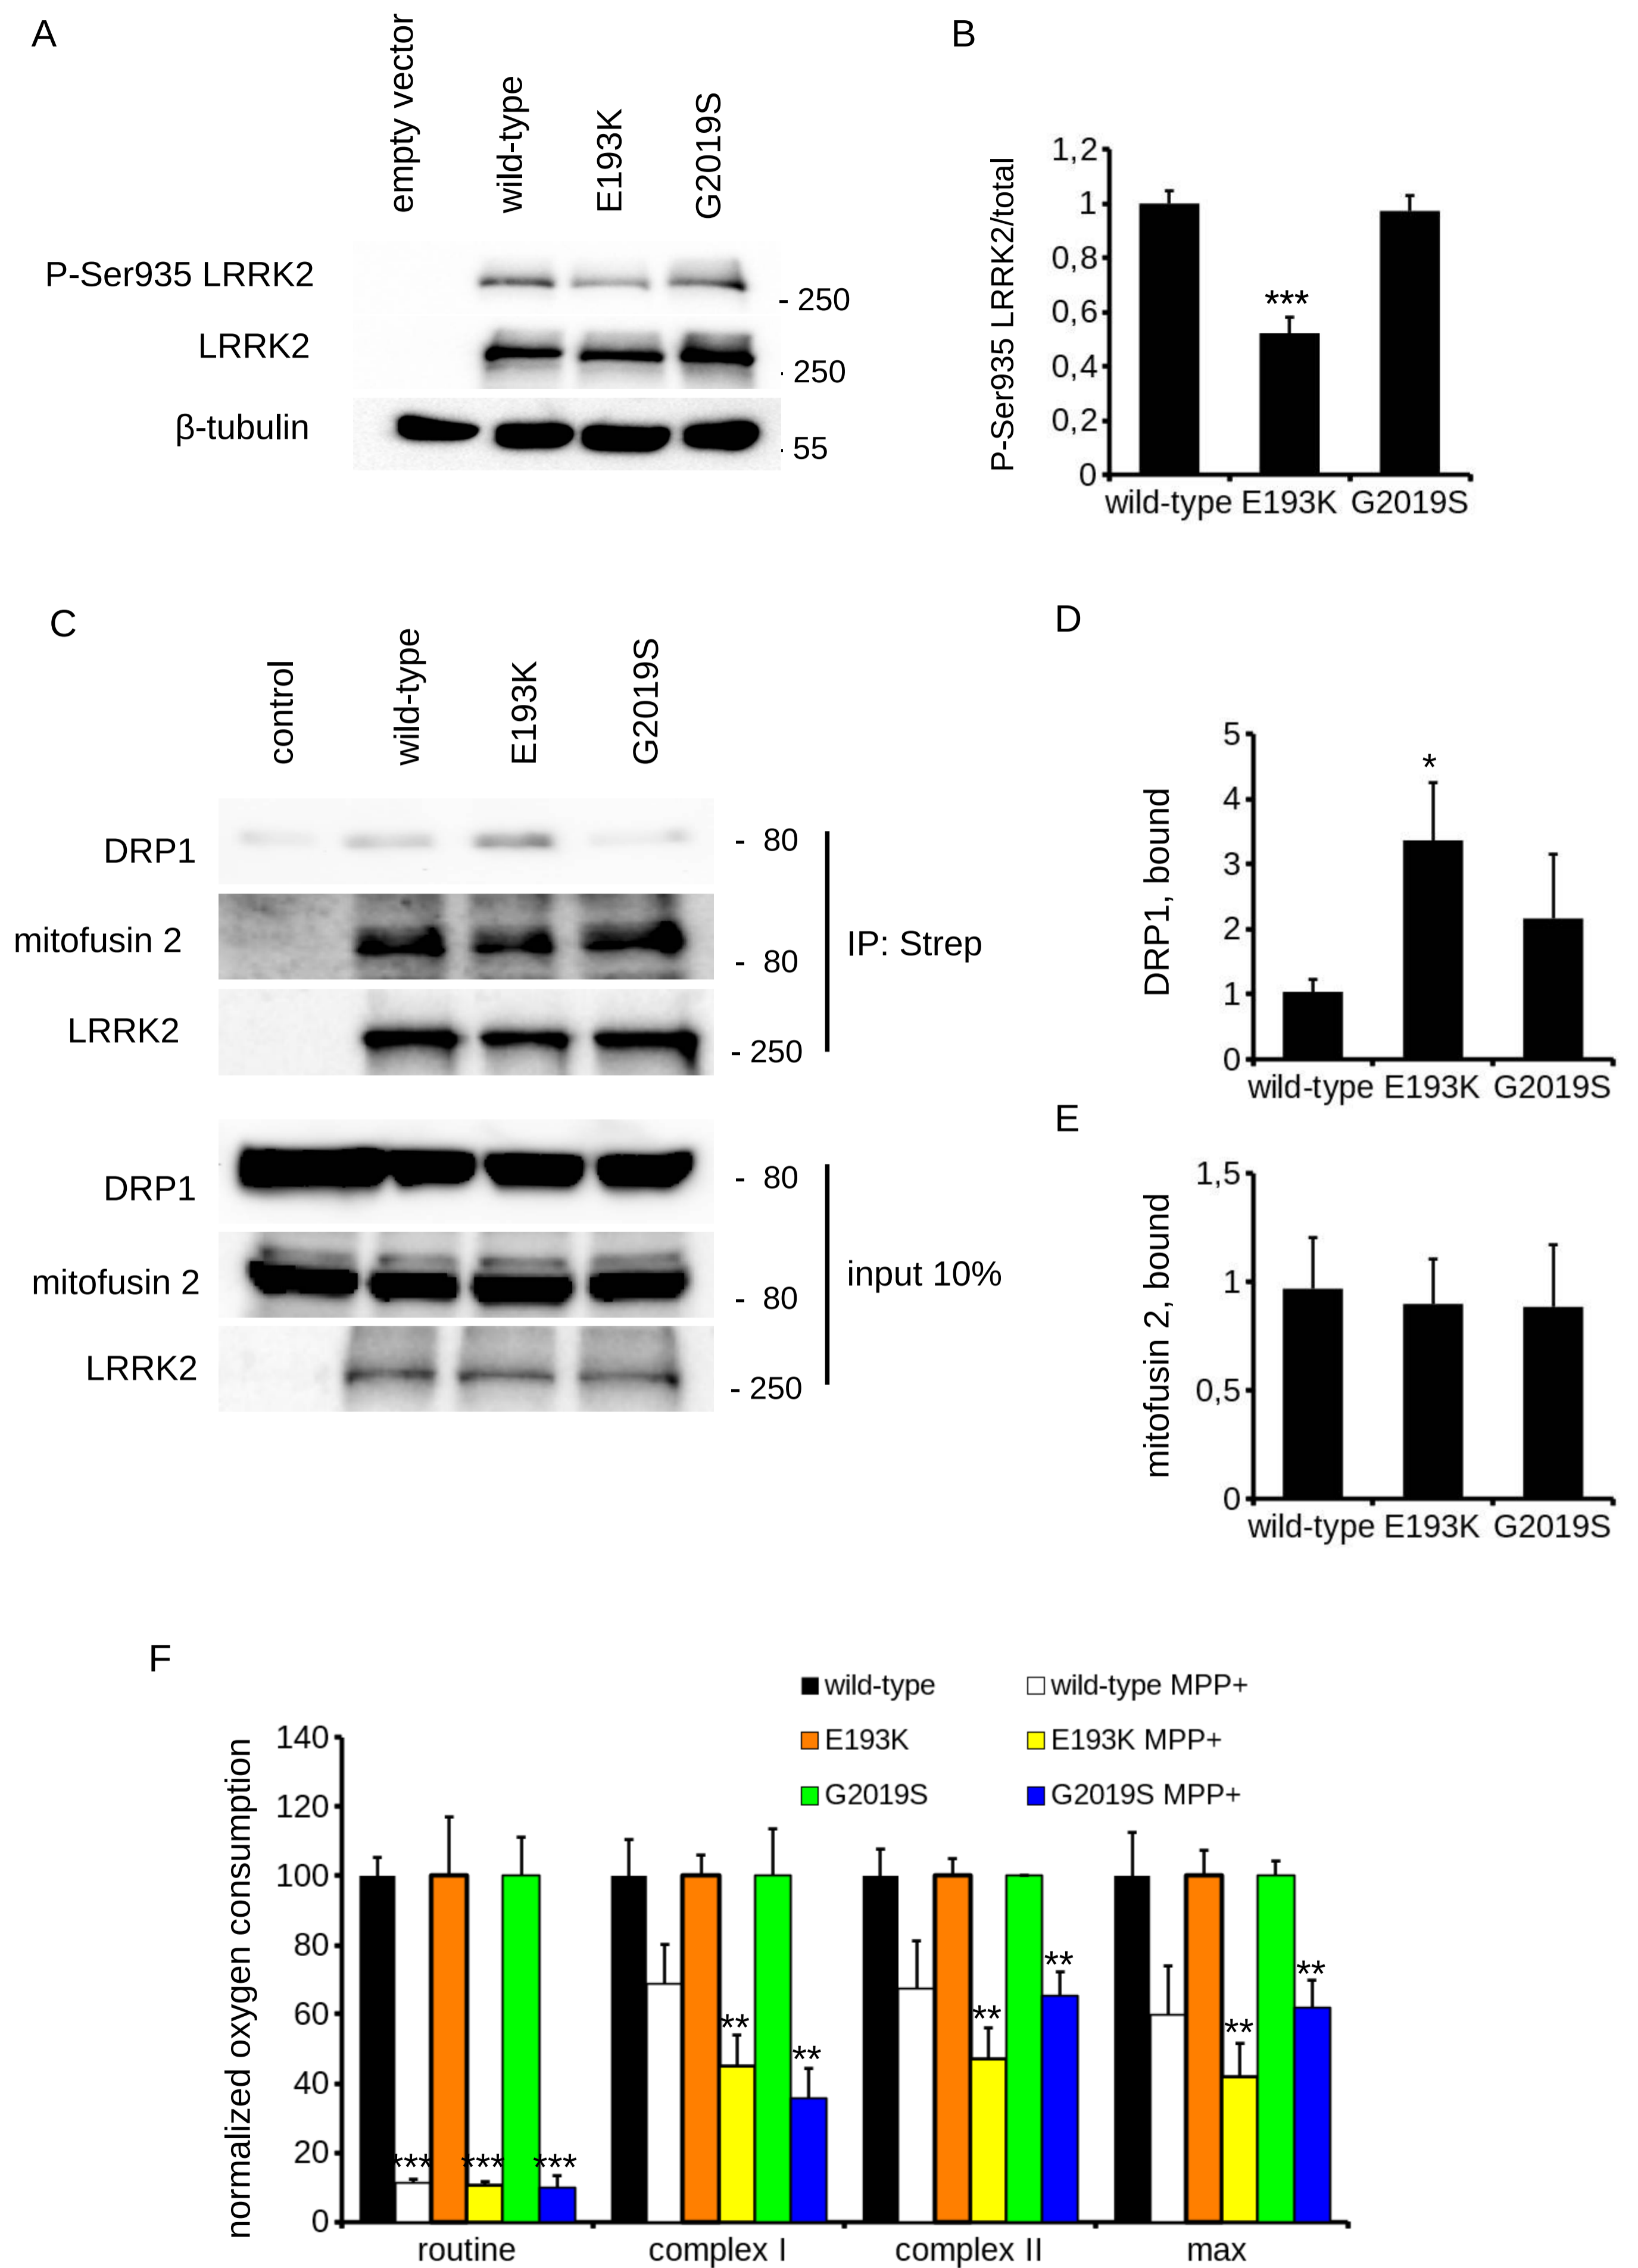

Supplementary figure 1

control

1 mM MPP+

wild-type

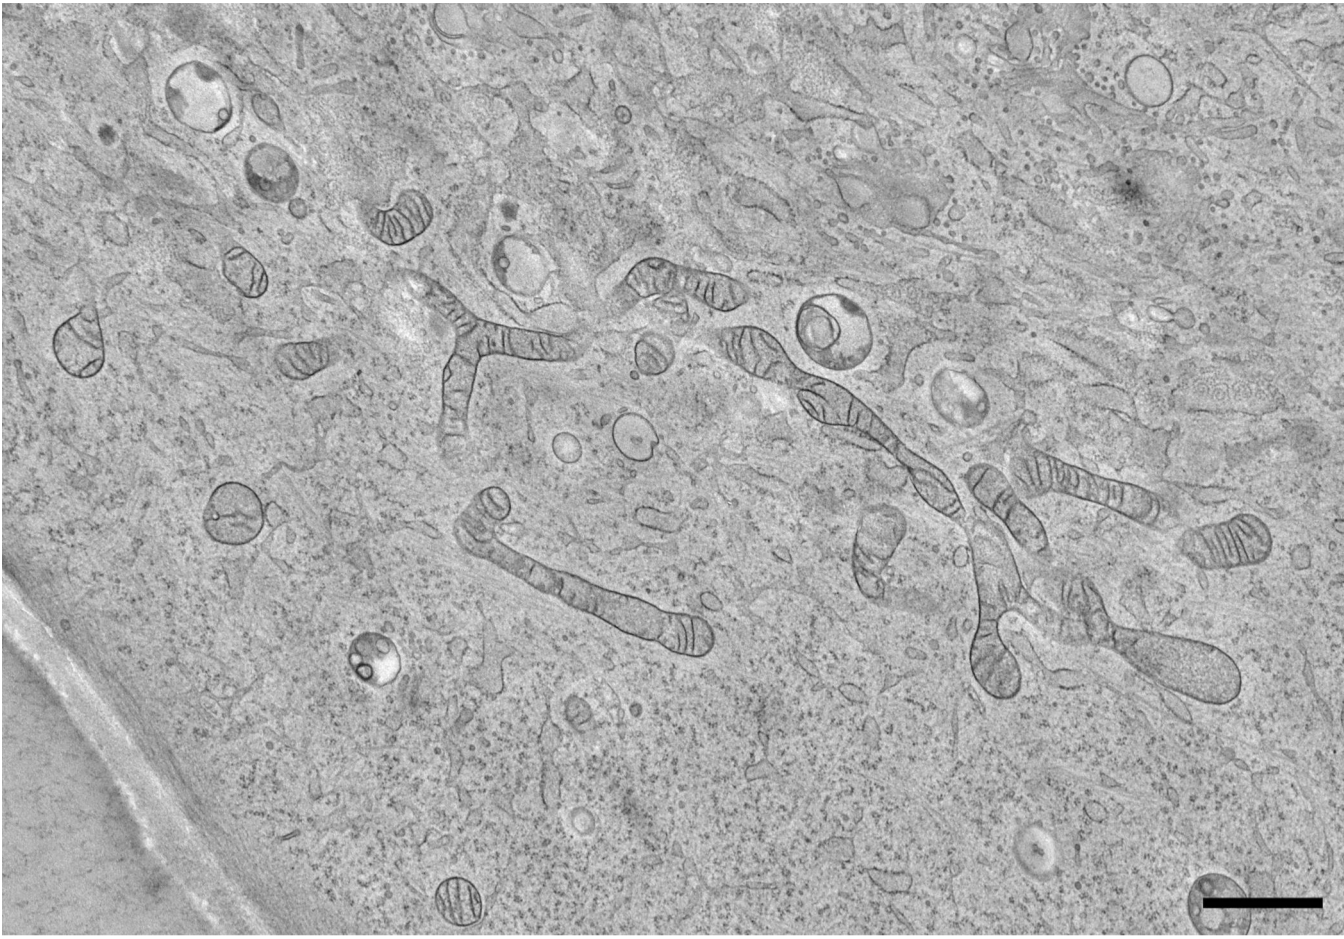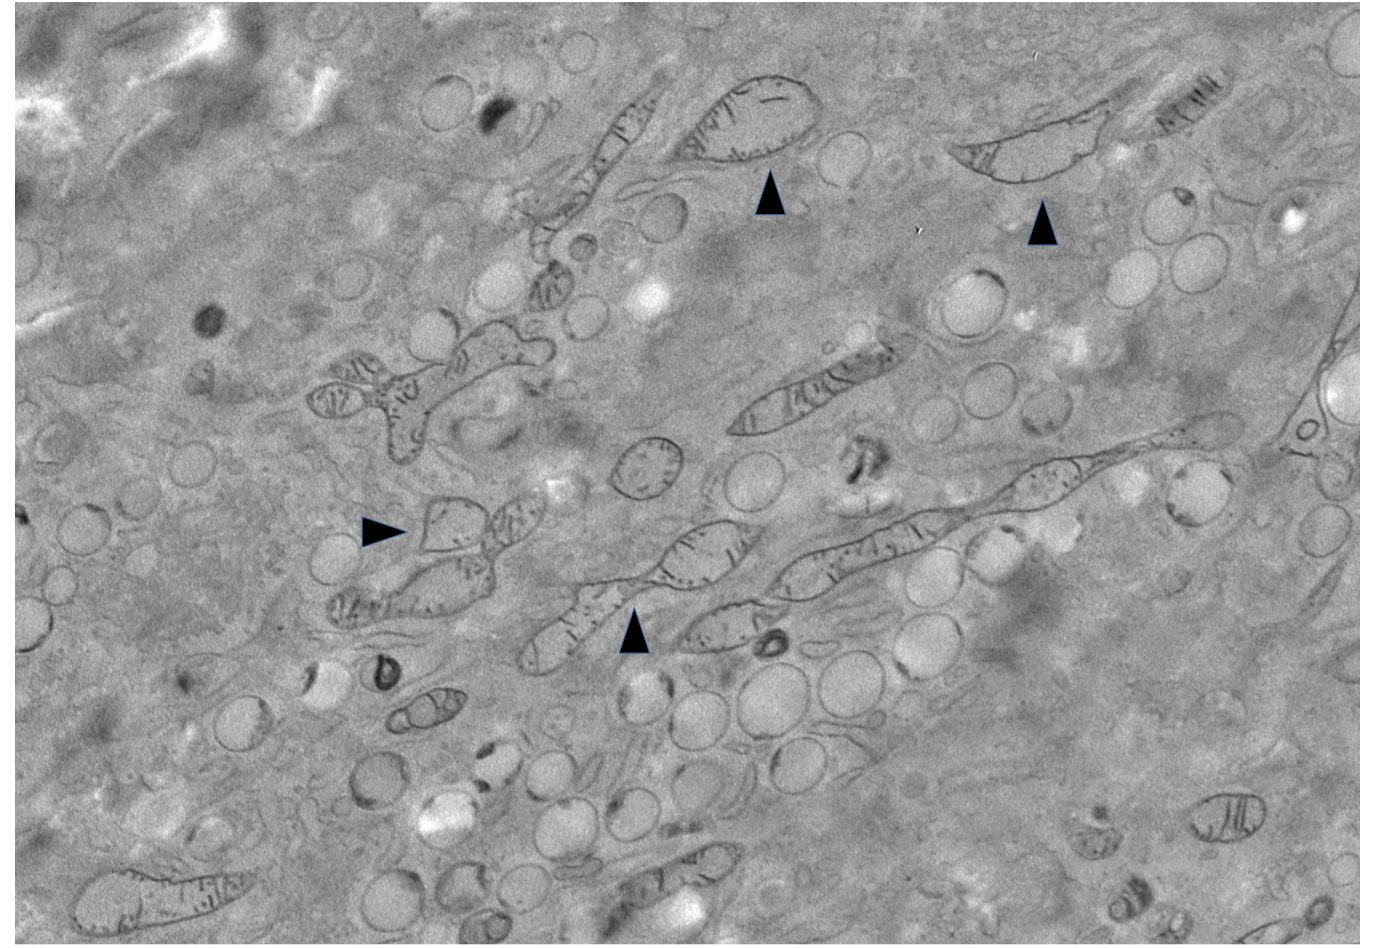

E193K

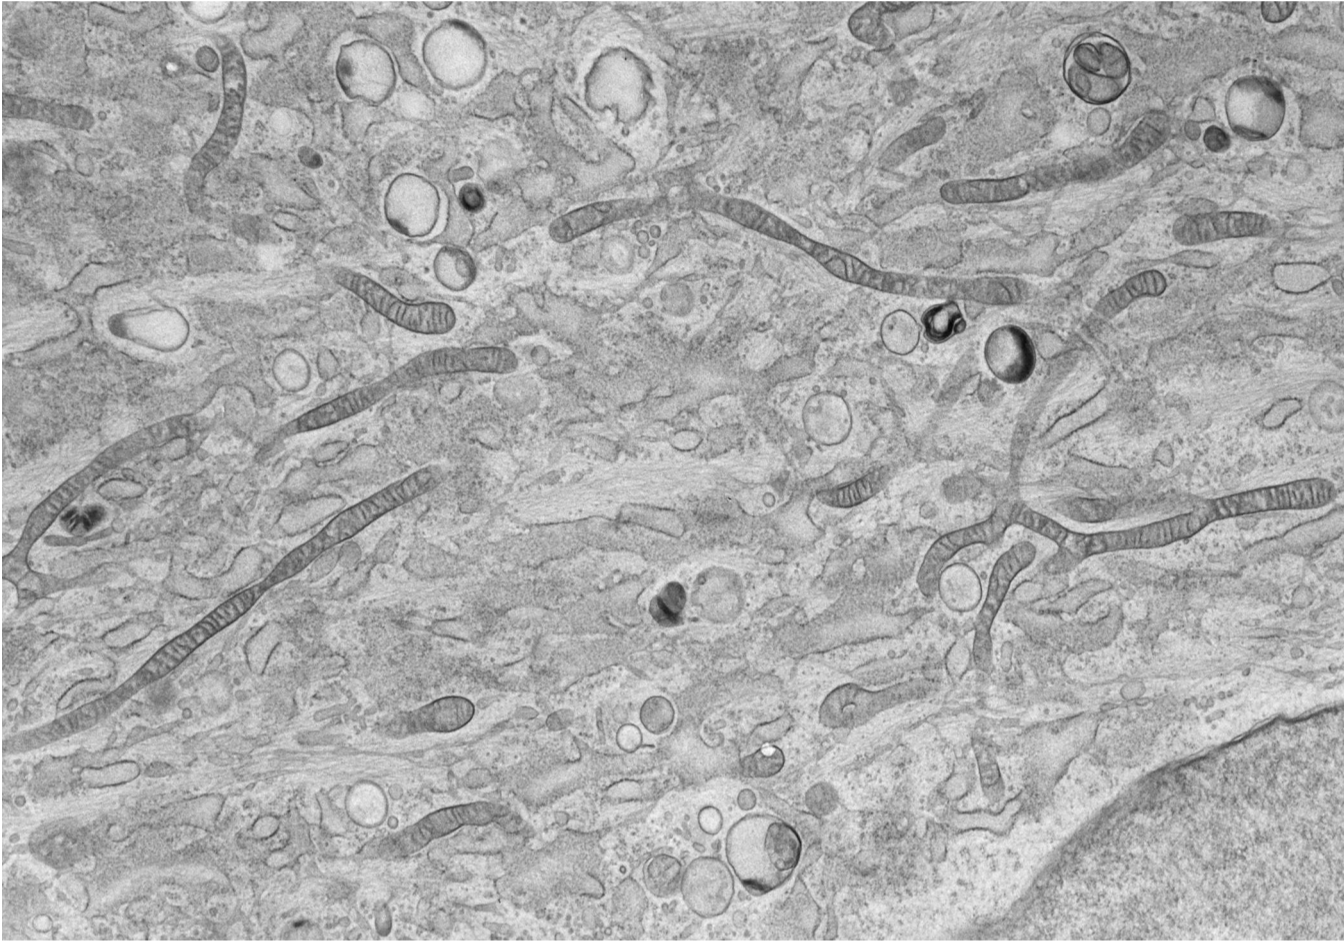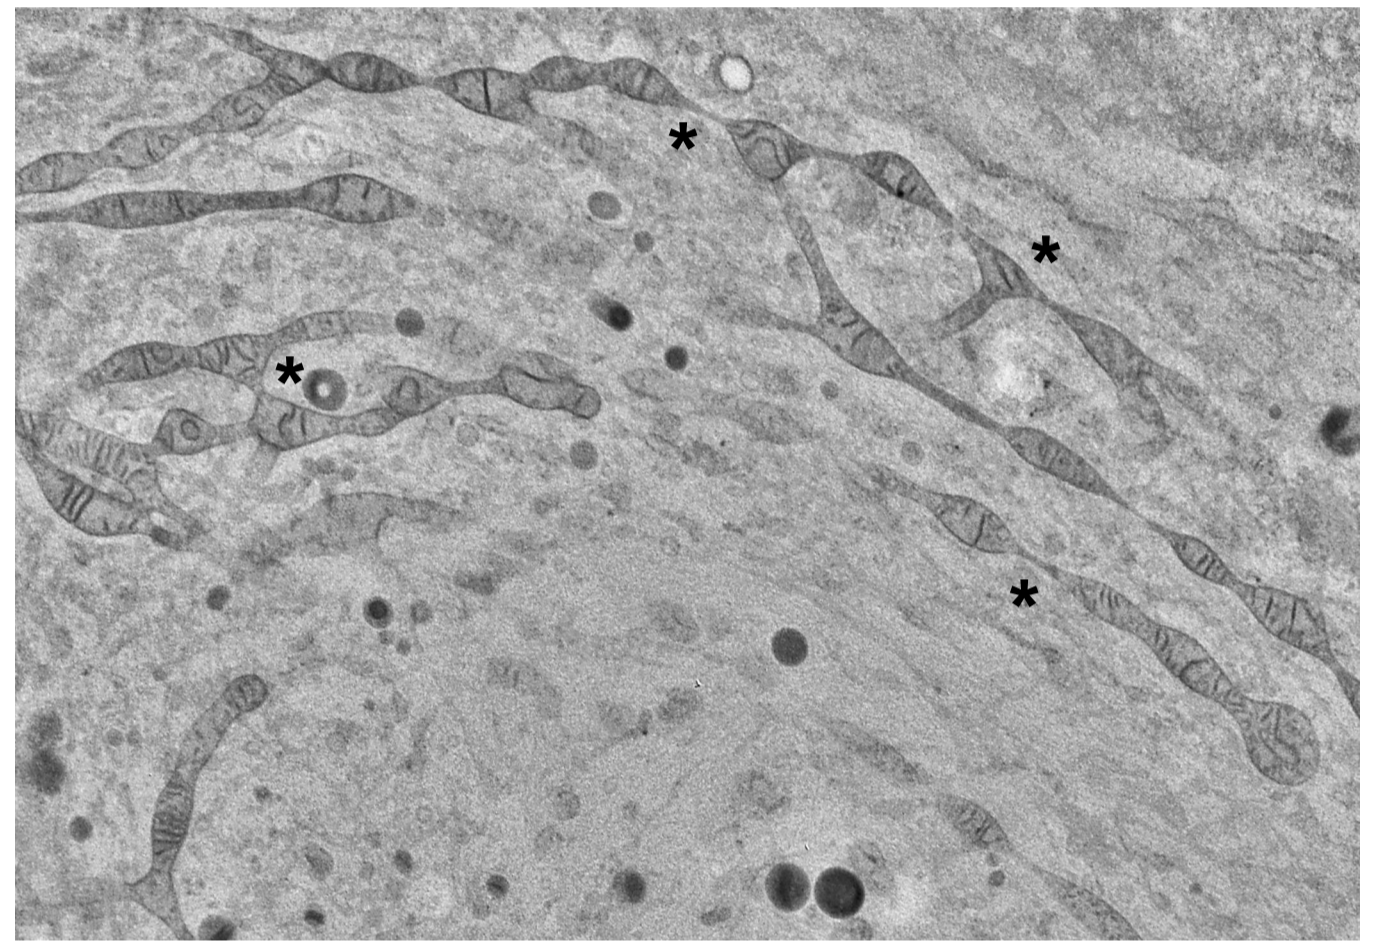

G2019S

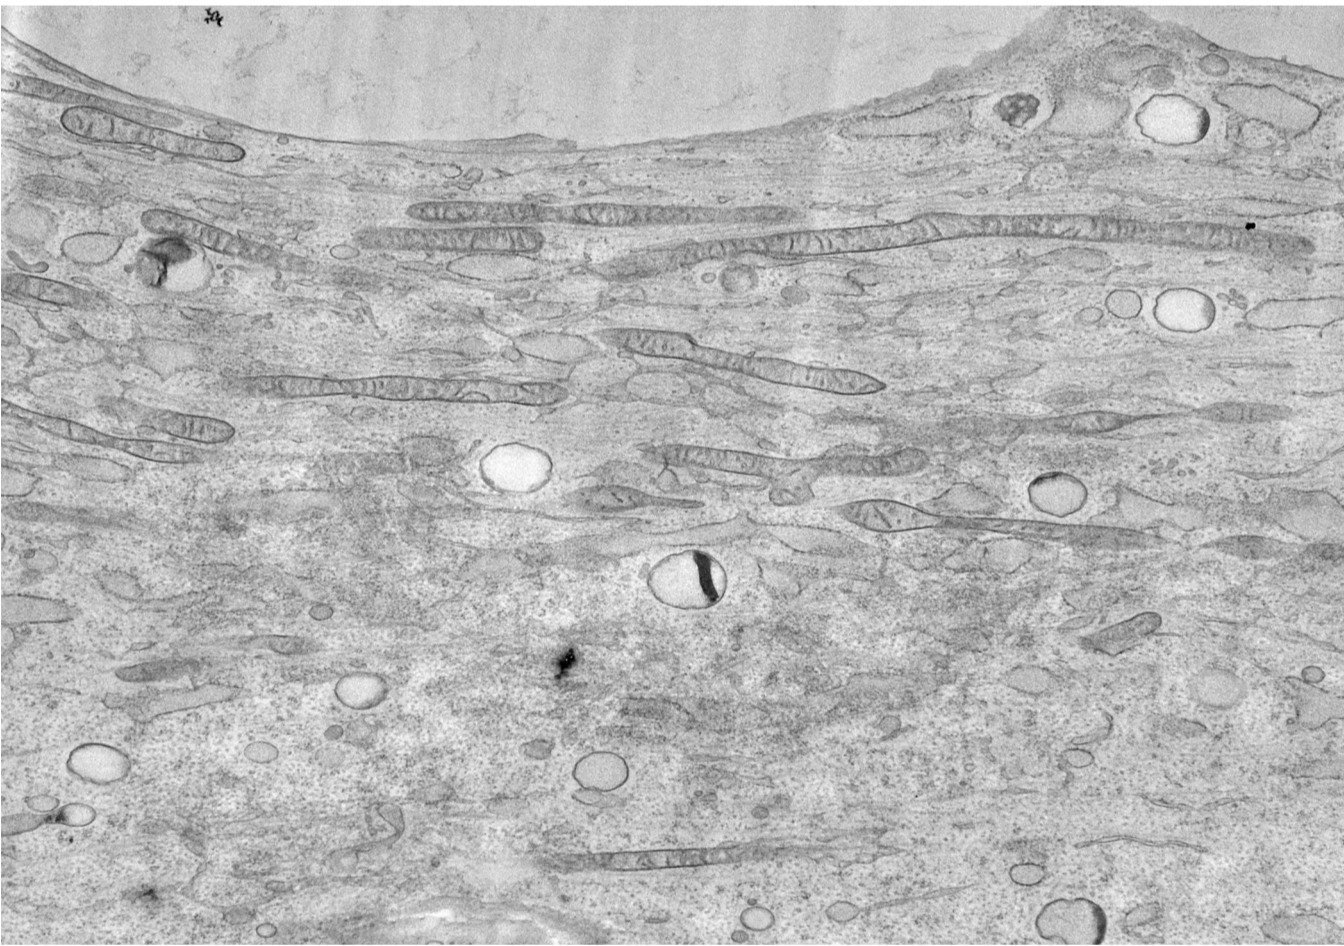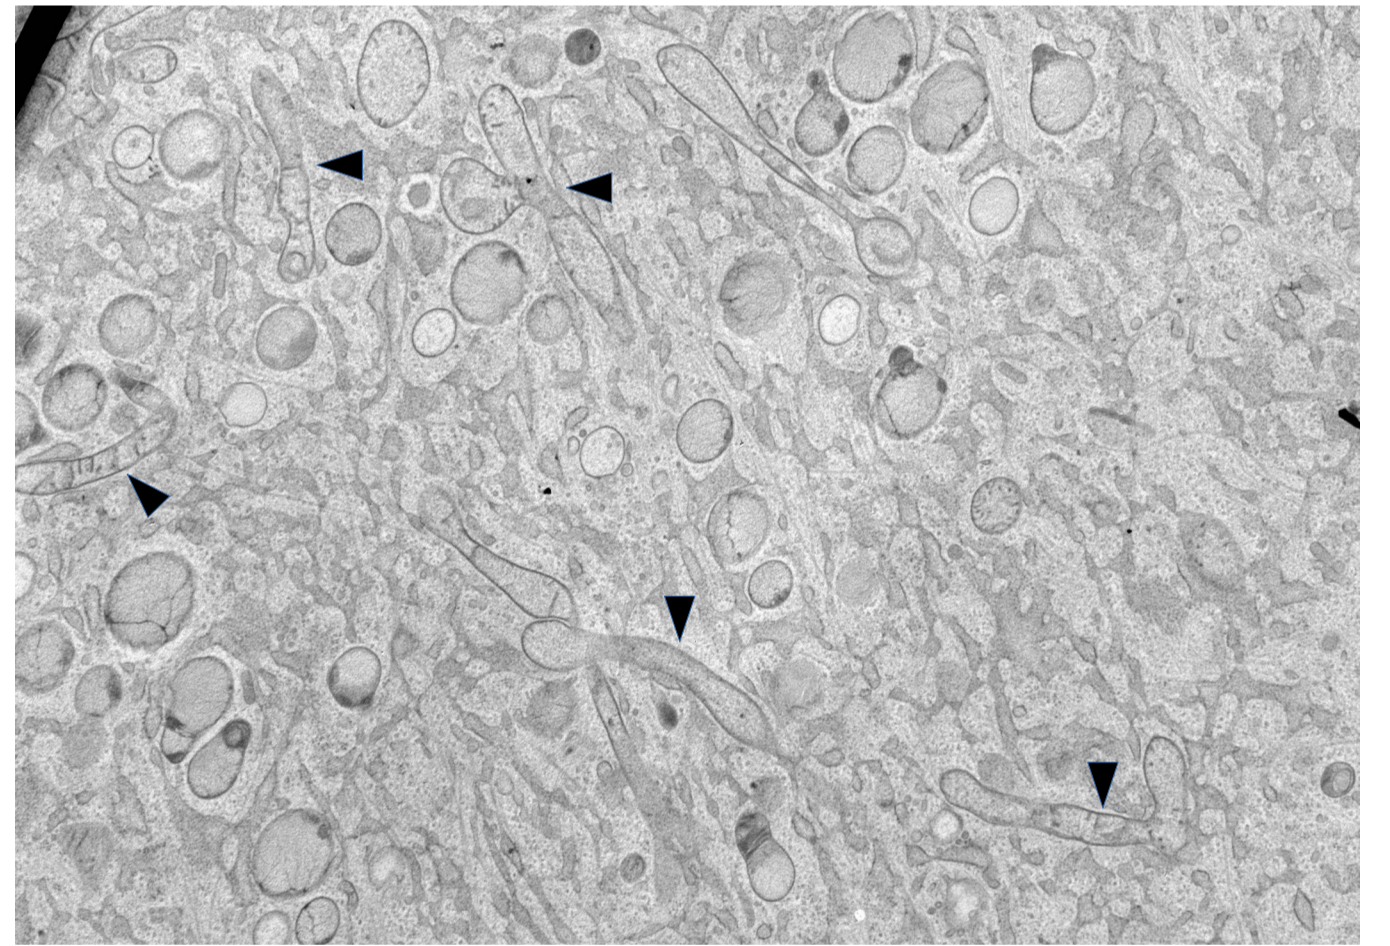

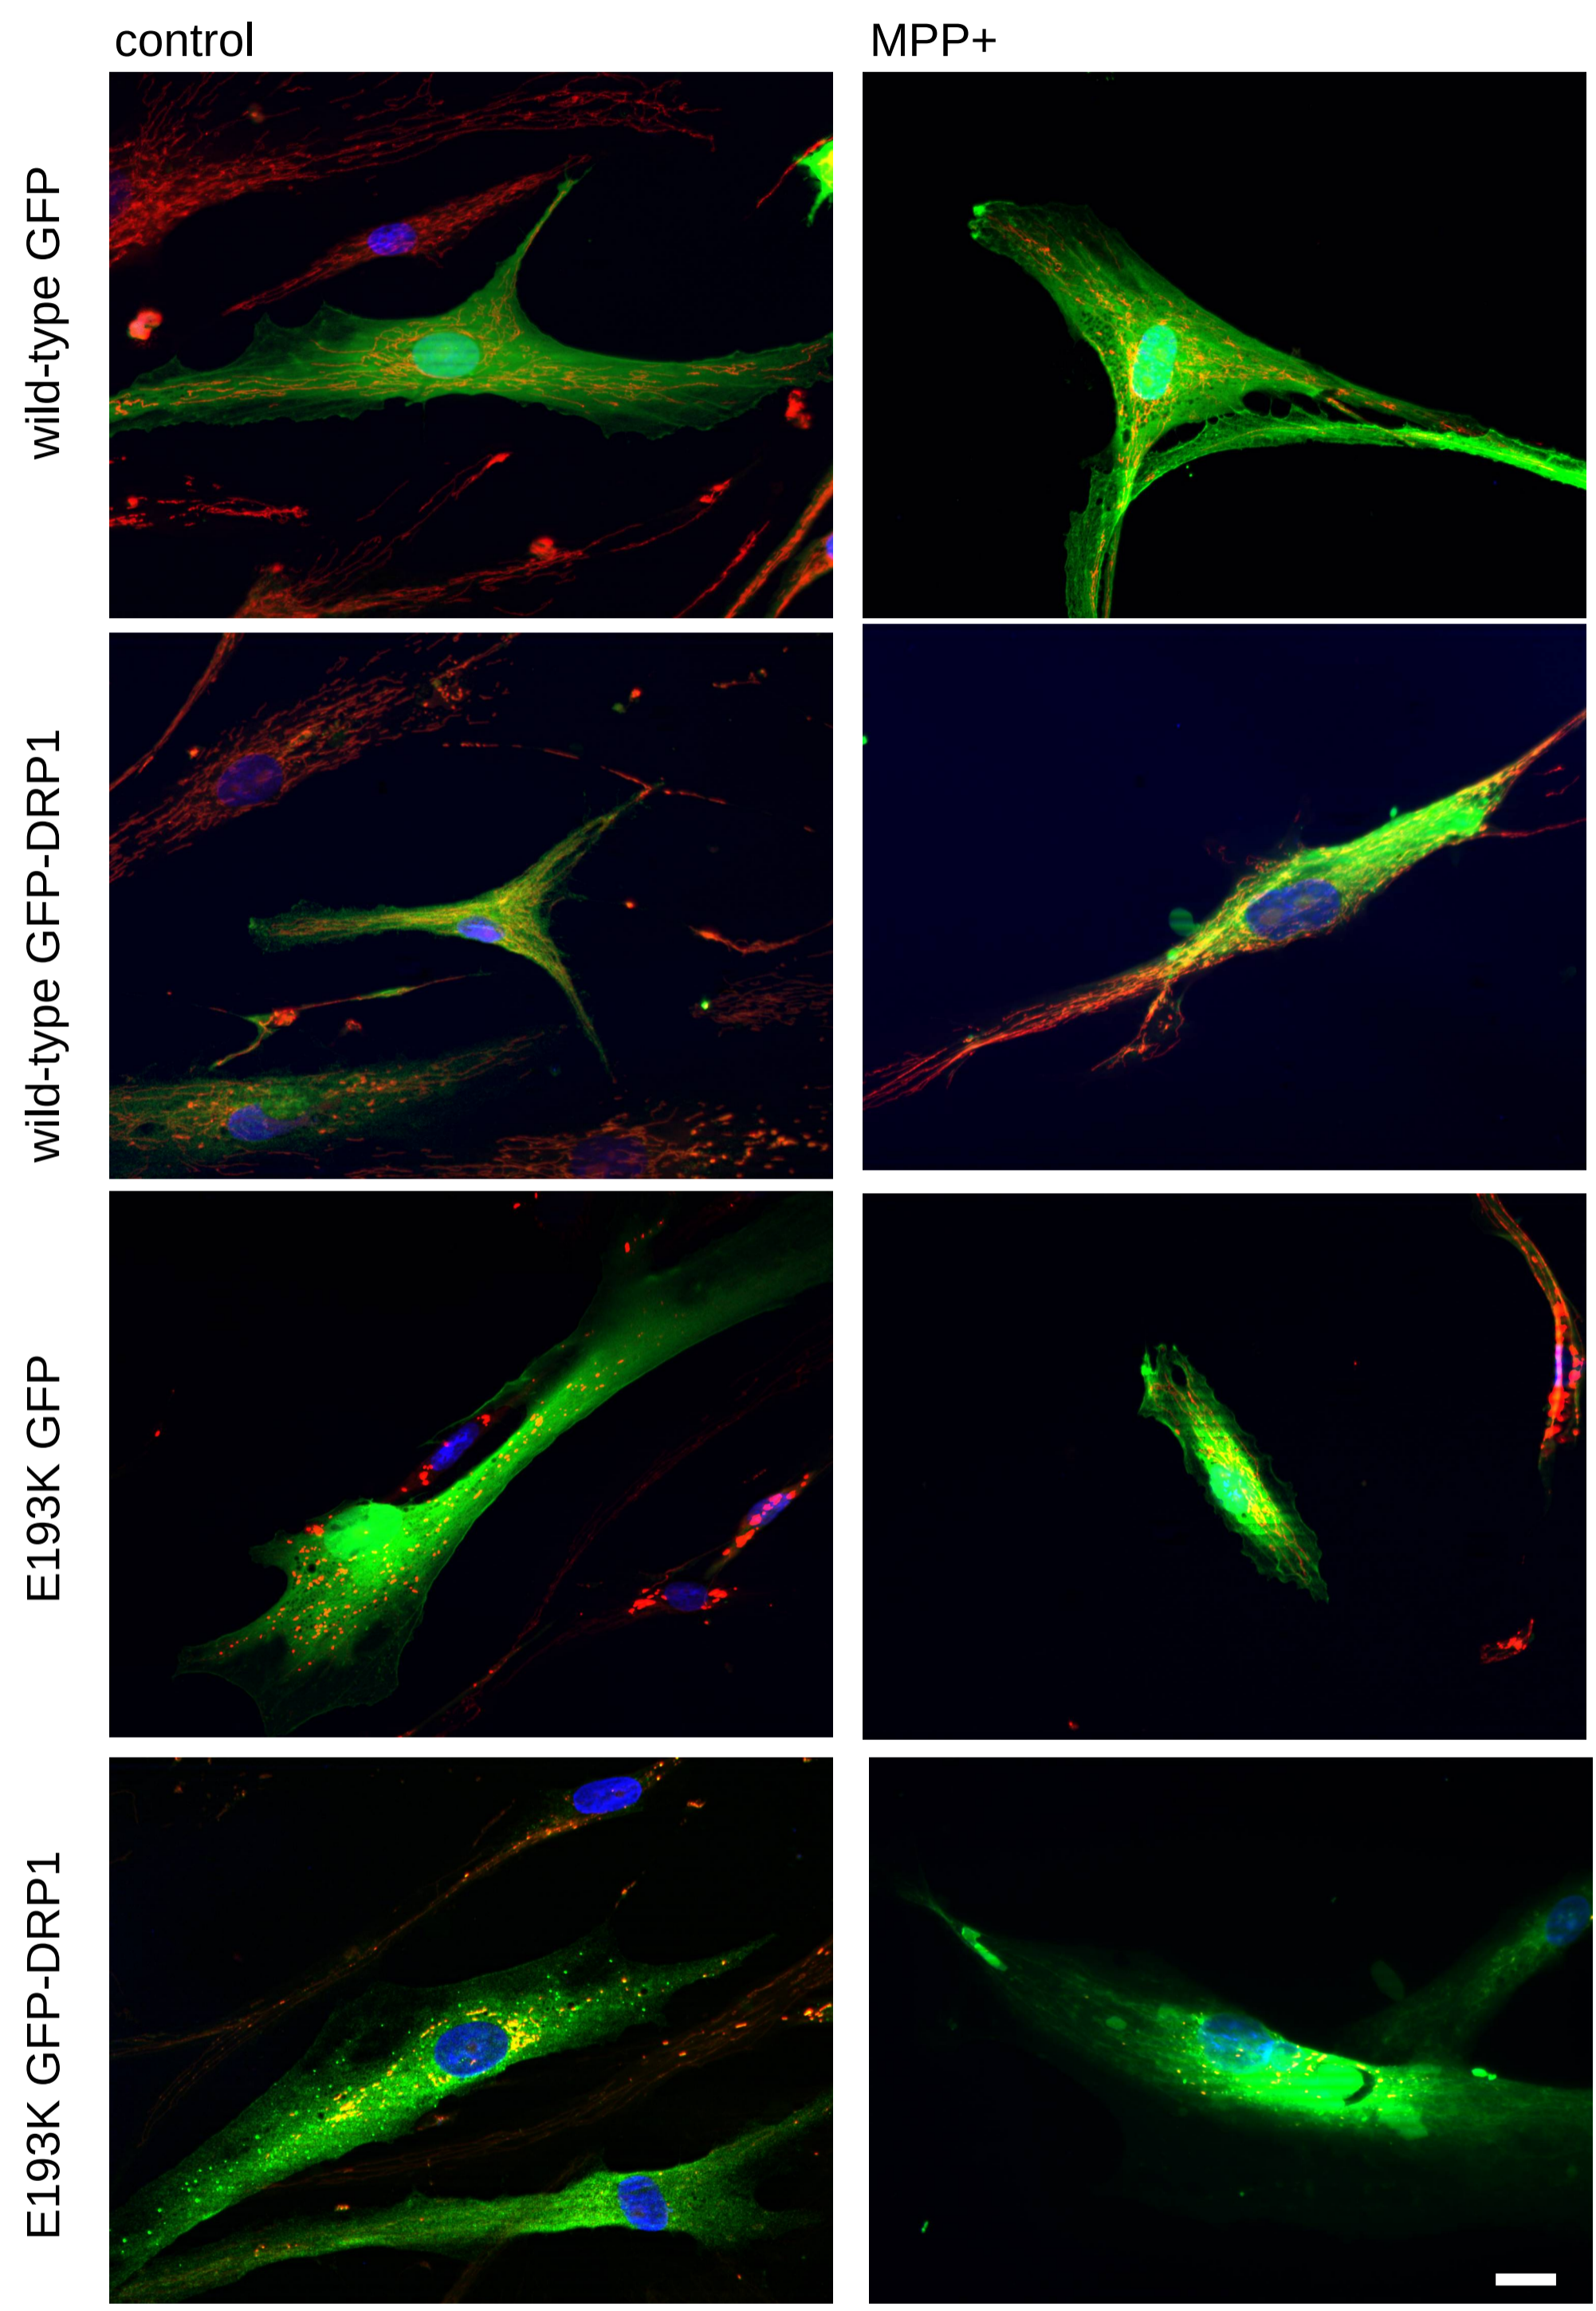

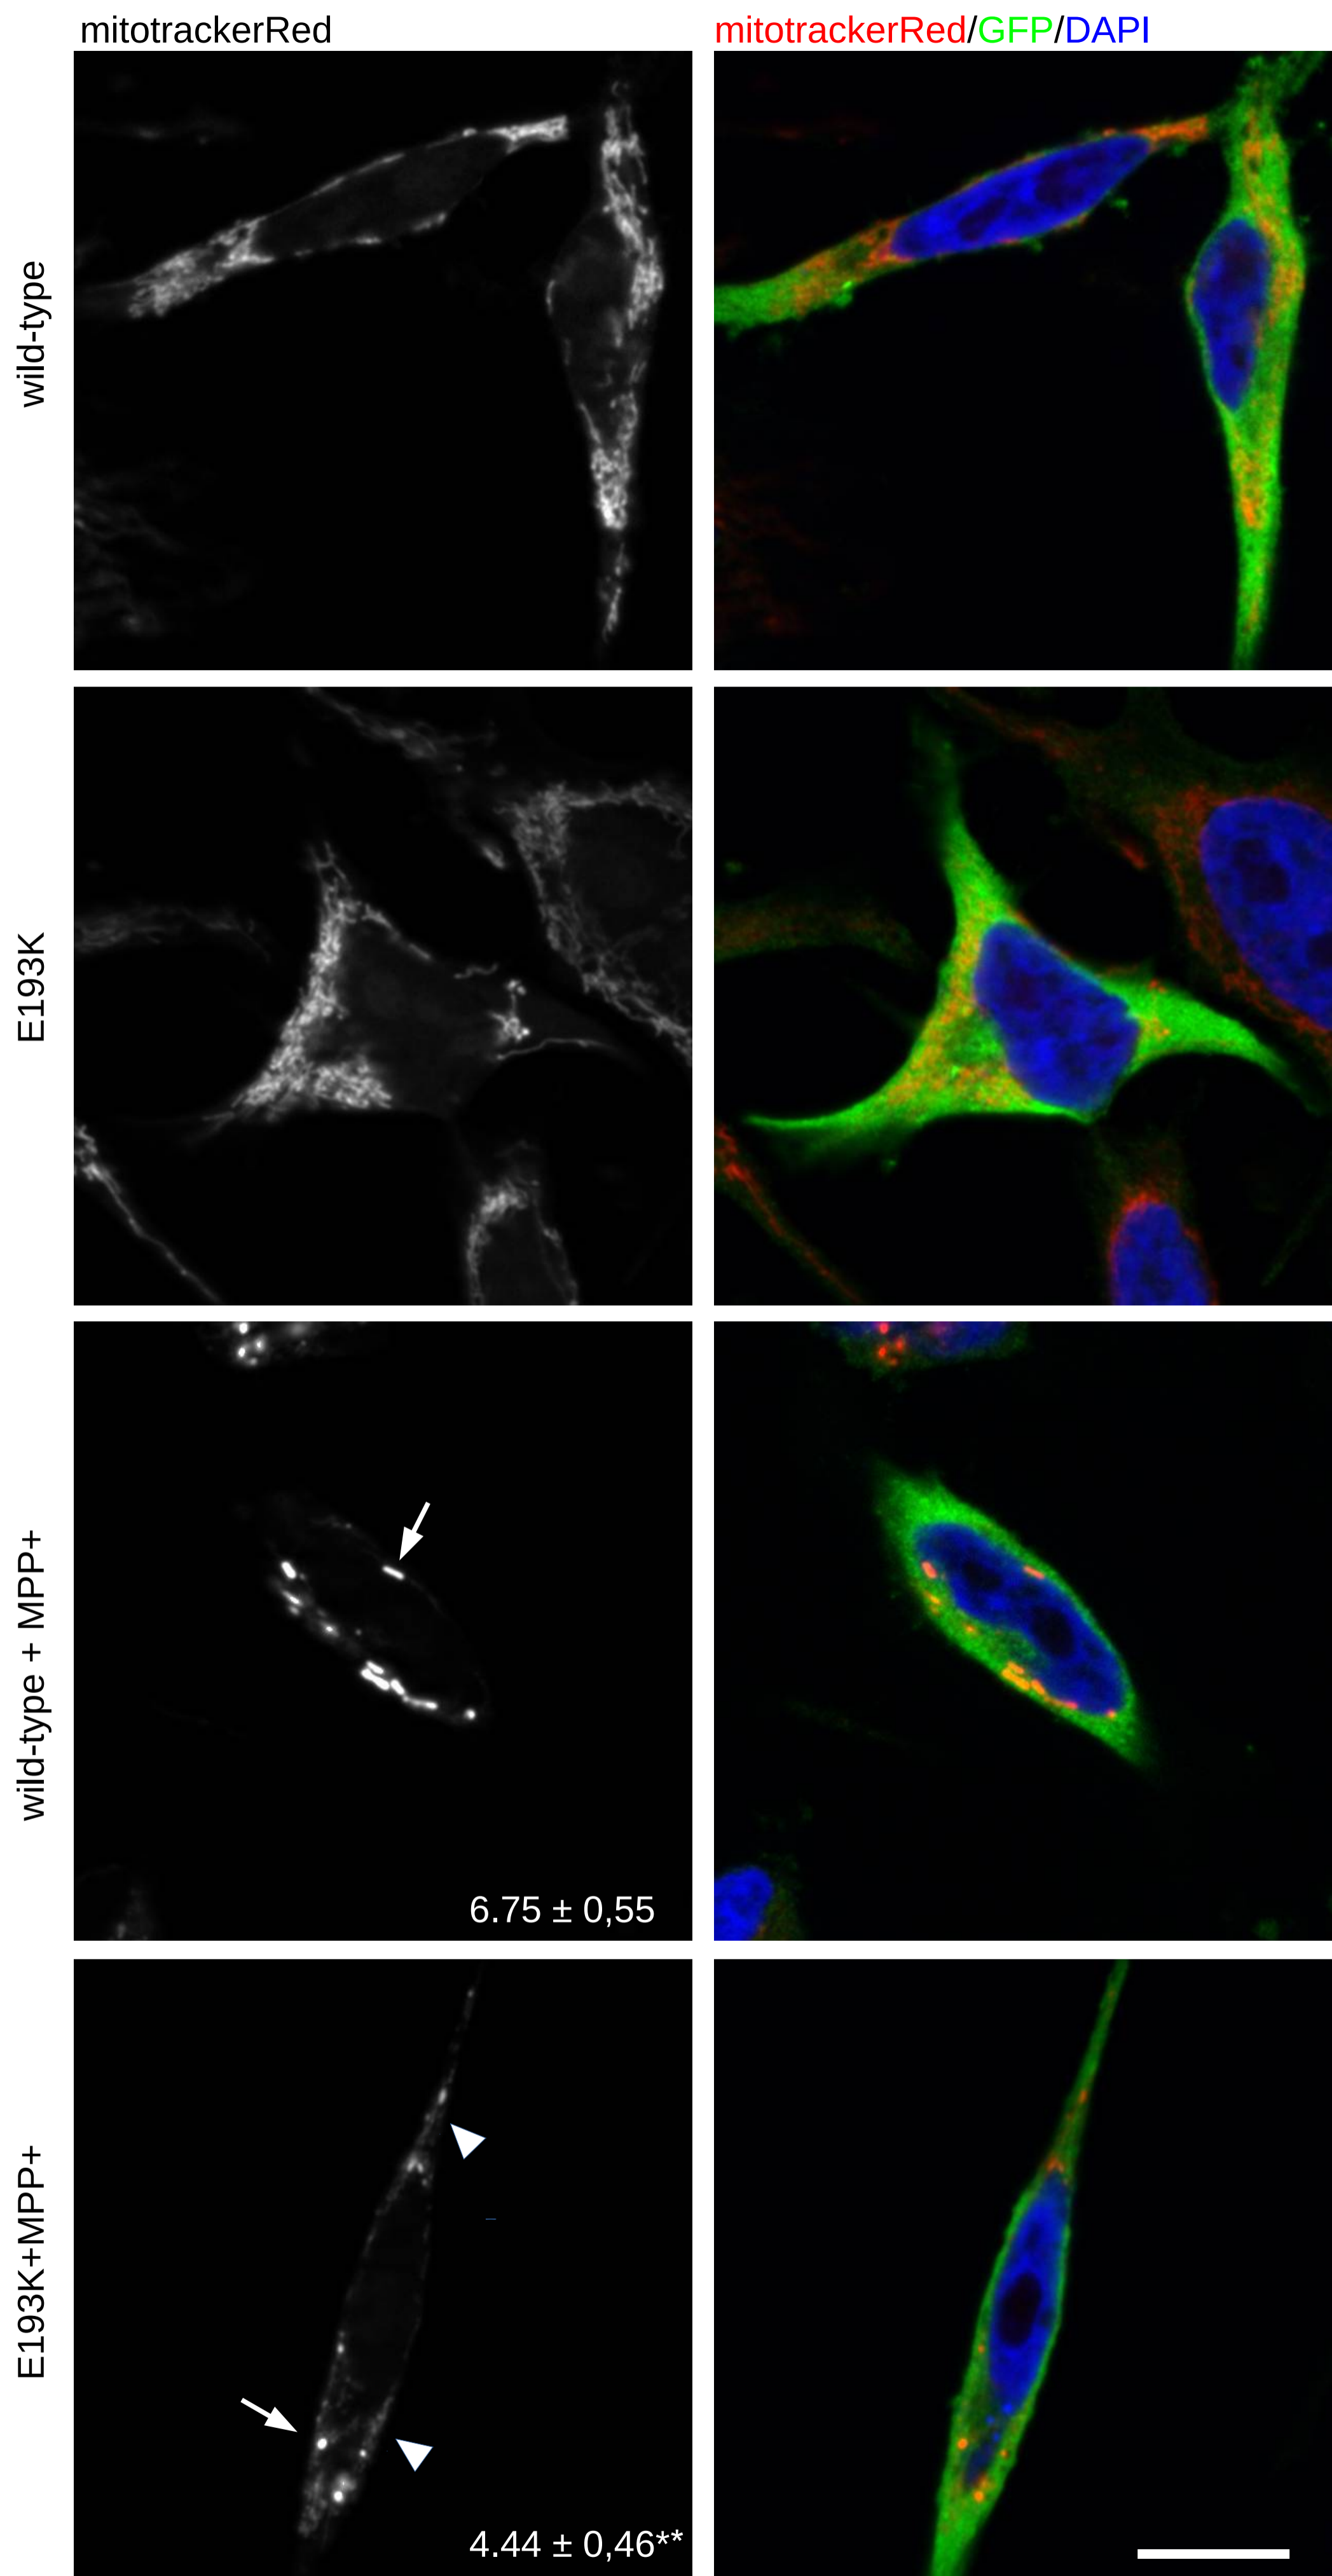

Supplementary figure 4
